# Supplementary material for: Lignan Glycosides and Flavonoid Glycosides from the Aerial Portion of Lespedeza cuneata and Their Biological Evaluations
Source: MDPI journal article supplement (doi:10.3390/molecules23081920), 2018-08-01
Supplement: s1 [file s1]

# Supplementary Material

Article

## Lignan Glycosides and Flavonoid Glycosides from the Aerial Portion of *Lespedeza cuneata* and Their Biological Evaluations

Jiwon Baek <sup>1</sup>, Tae Kyoung Lee <sup>1</sup>, Jae-Hyoung Song <sup>2</sup>, Enuyong Choi <sup>3</sup>, Hyun-Jeong Ko <sup>2</sup>, Sanghyun Lee <sup>4</sup>, Sang Un Choi <sup>5</sup>, Seong Lee <sup>6</sup>, Sang-Woo Yoo <sup>7</sup>, Seon-Hee Kim <sup>3</sup> and Ki Hyun Kim <sup>1,\*</sup>

<sup>1</sup> School of Pharmacy, Sungkyunkwan University, Suwon 16419, Korea; baekd5nie@gmail.com (J.B.); charmelon8@gmail.com (T.K.L.)

<sup>2</sup> College of Pharmacy, Kangwon National University, Chuncheon 24341, Korea; thdwohud@naver.com (J.H.S.); hjko@kangwon.ac.kr (H.J.K.)

<sup>3</sup> Sungkyun Biotech Co. Ltd., Suwon 16419, Korea; eychoi8812@sungkyunbiotech.co.kr (E.C.); seonhee31@gmail.com (S.H.K.)

<sup>4</sup> Department of Integrative Plant Science, Chung-Ang University, Anseong 17546, Korea; slee@cau.ac.kr

<sup>5</sup> Korea Research Institute of Chemical Technology (KRICT), Daejeon 34114, Korea; suchoi@kRICT.re.kr

<sup>6</sup> Dankook University Hospital Research Institute of Clinical Medicine, Cheonan 31116, Korea; seonglee@empas.com

<sup>7</sup> Research & Development Center, Natural Way Co., Ltd., Pocheon 11160, Korea; nmrmr@hanmail.net

\* Correspondence: khkim83@skku.edu; Tel.: +82-31-290-7700

Received: 9 July 2018; Accepted: 30 July 2018; Published: 1 August 2018

## *General Experimental Procedures*

HR-ESI mass spectra were acquired using a Waters Xevo G2 QTOF mass spectrometer with an analytical Acquity UPLC column (2.1 × 100 mm, 1.7 μm) (Waters MS Technologies, Manchester, UK). Optical rotations were measured (path length of the measuring tube, 10 cm) using a Jasco P-1020 polarimeter (Jasco, Easton, MD, USA) at room temperature. Ultraviolet (UV) spectra were acquired using an Agilent 8453 UV-visible spectrophotometer (Agilent Technologies, Santa Clara, CA, USA). IR spectra were acquired using a Bruker IFS-66/S FT-IR spectrometer, and NMR spectra were acquired using a Bruker Avance III HD 800 NMR spectrometer with a 5-mm TCI Cryoprobe (Bruker, Karlsruhe, Germany). Preparative HPLC and semi-preparative HPLC were performed using a Waters 1525 binary HPLC pump with a Waters 996 photodiode array detector and an analytical Agilent Eclipse XDB-C18 column (250 × 21.2 mm, 7 μm) (Waters Corporation, Milford, CT, USA), and a Phenomenex Luna phenyl-hexyl 100 Å column (250 × 10 mm, 10 μm), respectively. LC/MS analysis was performed using an Agilent 1200 Series HPLC system equipped with a diode array detector coupled with a 6130 Series ESI mass spectrometer using an analytical Kinetex column (2.1 × 100 mm, 5 μm) (Agilent Technologies, Santa Clara, CA, USA). Column chromatography was performed with either silica gel 60 (Merck, 230–400 mesh) or RP-C18 silica gel (Merck, 230–400 mesh). Sephadex LH-20 (Pharmacia, Uppsala, Sweden) was used for molecular sieve column chromatography, and Diaion HP-20 (Mitsubishi Chemical, Tokyo, Japan) was used for open-column chromatography. Analytical grade solvents (Samchun Pure Chemicals Co., Ltd., Pyeongtaek, Korea) were used for all fractionation and isolation. Merck precoated silica gel F<sub>254</sub> plates and reversed-phase (RP)-18 F<sub>254s</sub> plates were used for TLC, and the spots were detected either under UV light (dual wavelength 254/365 nm) or by heating after spraying with anisaldehyde-sulfuric acid.

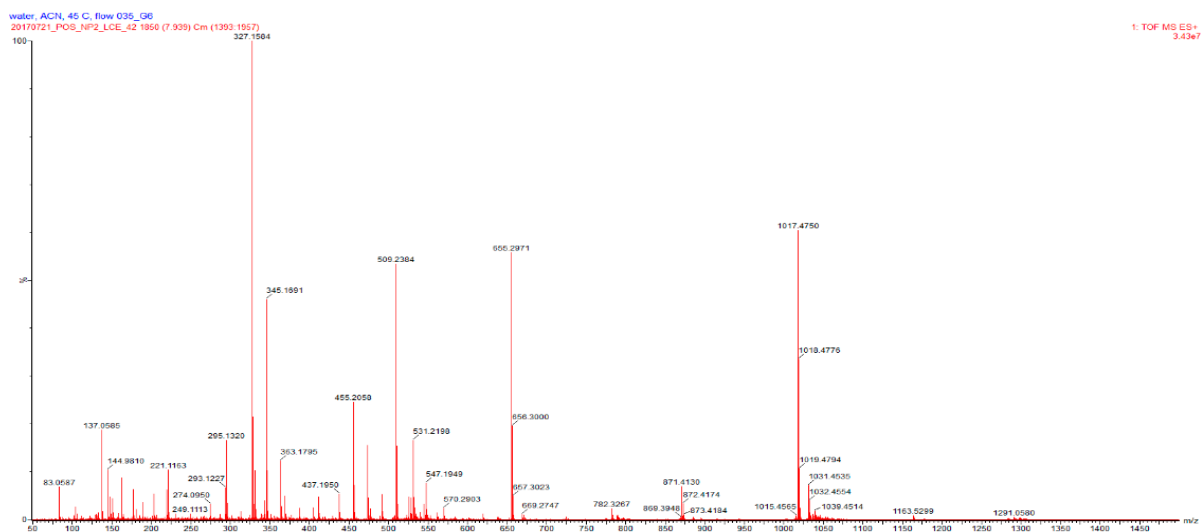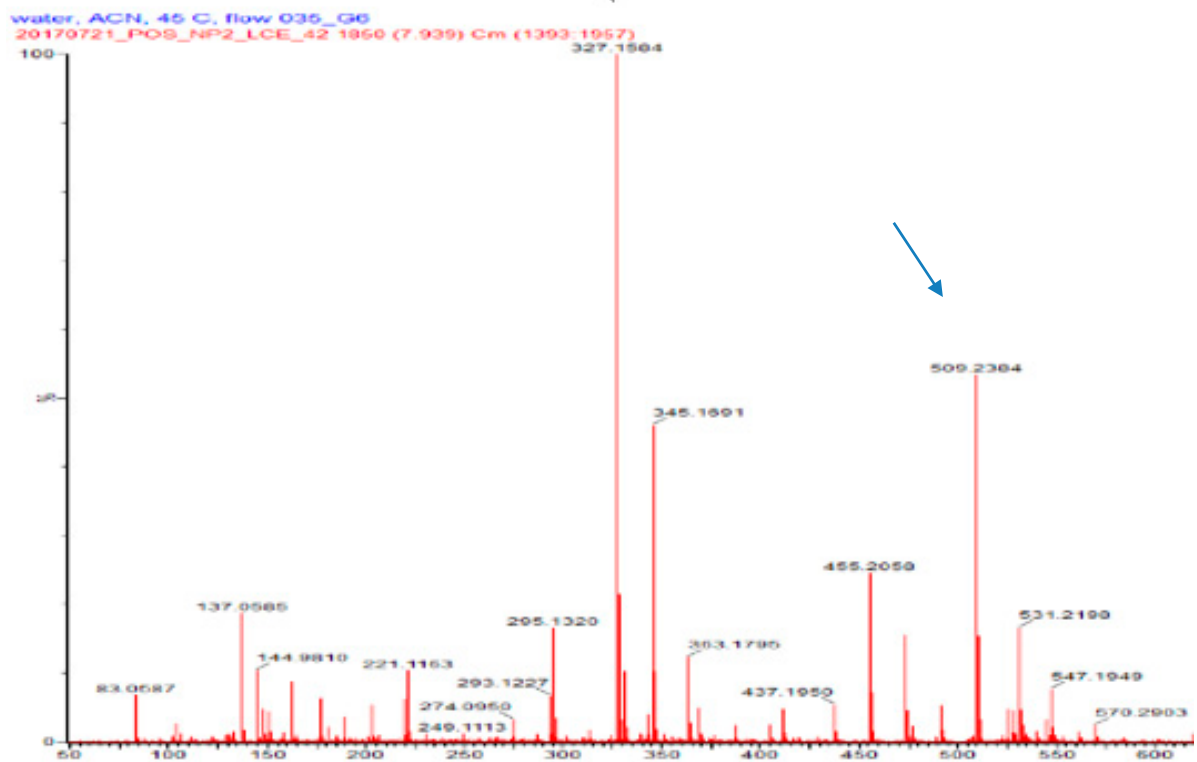

Figure S1. HR-ESI-MS of compound 1.

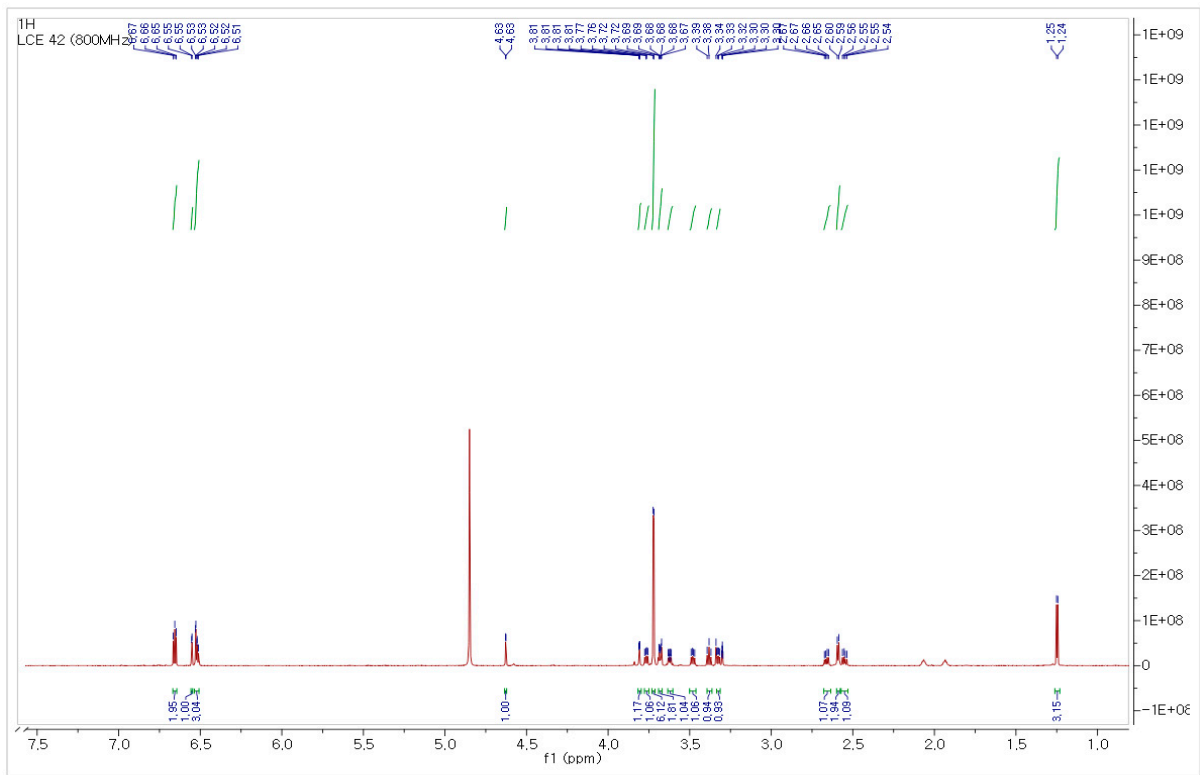

Figure S2. <sup>1</sup>H NMR spectrum of compound 1.

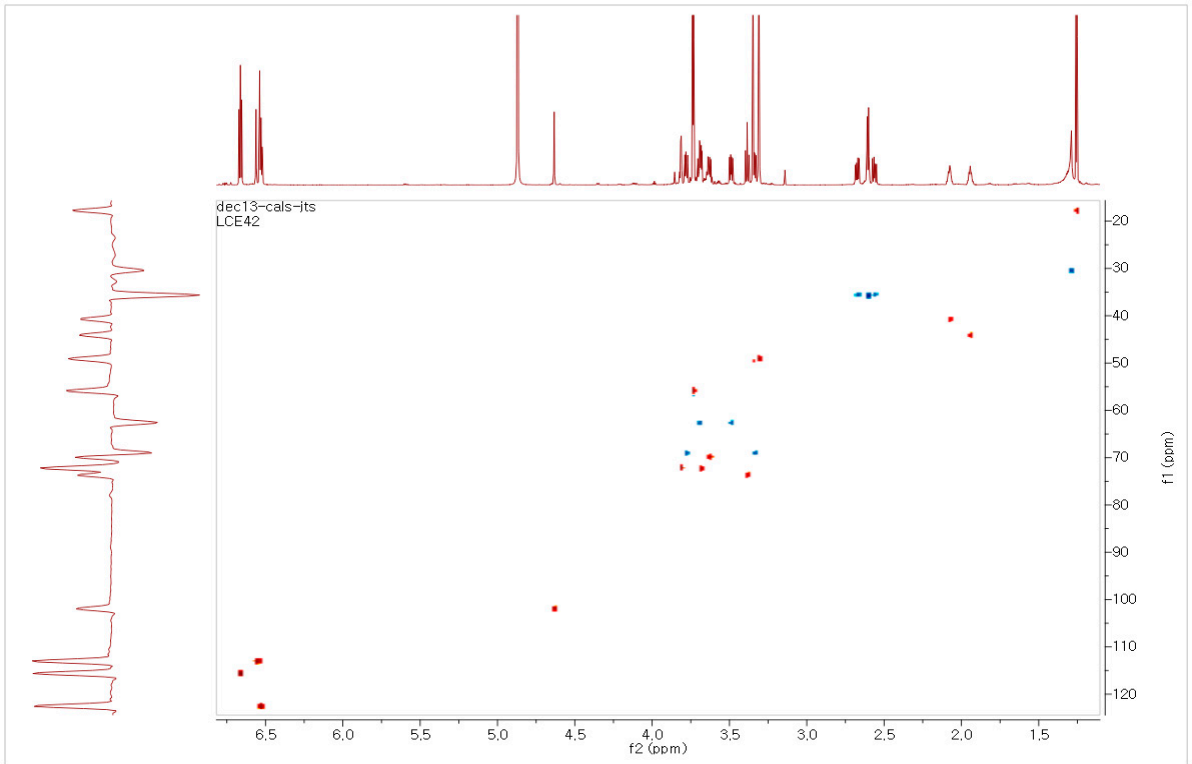

Figure S3. HSQC spectrum of compound 1.

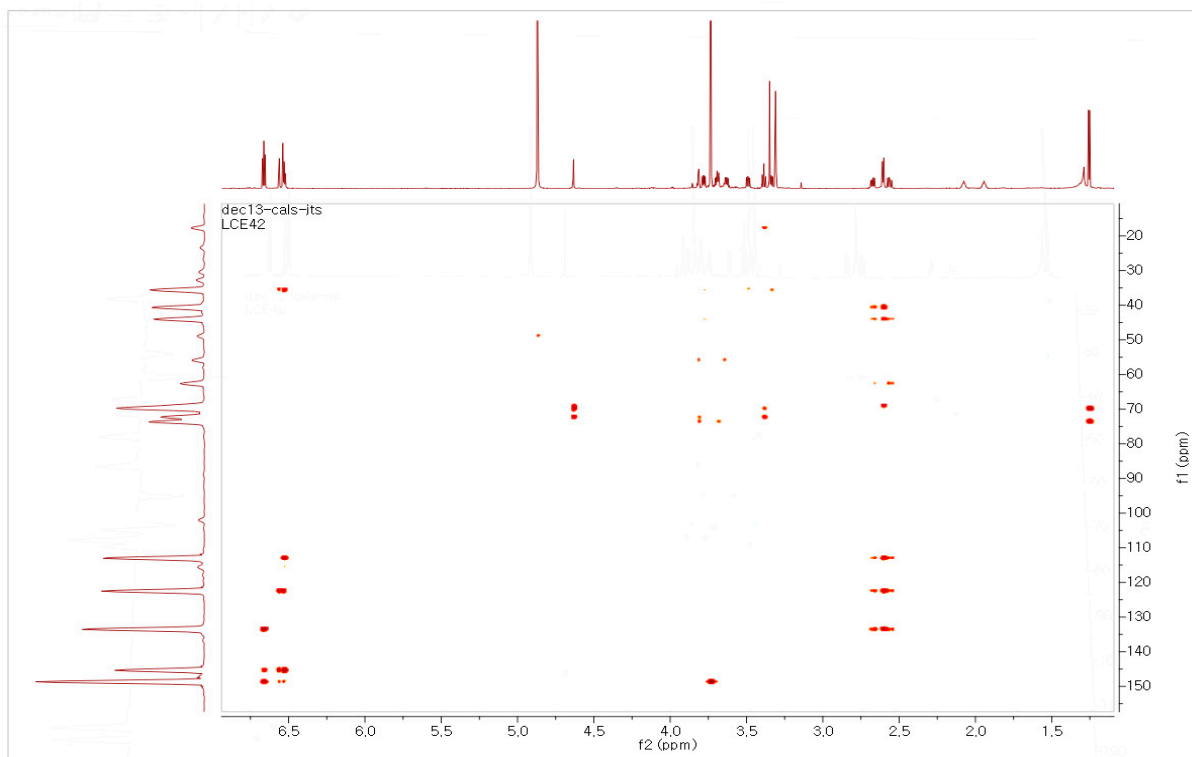

Figure S4. HMBC spectrum of compound 1.

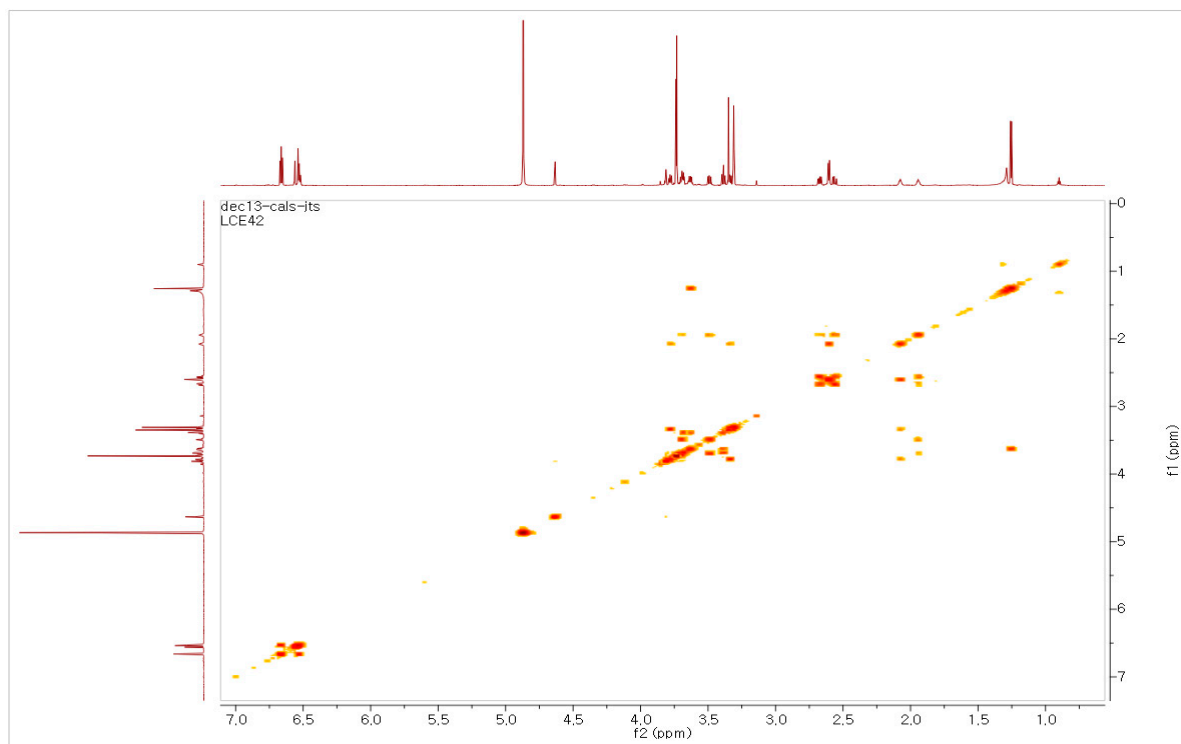

Figure S5. <sup>1</sup>H-<sup>1</sup>H COSY spectrum of compound 1.

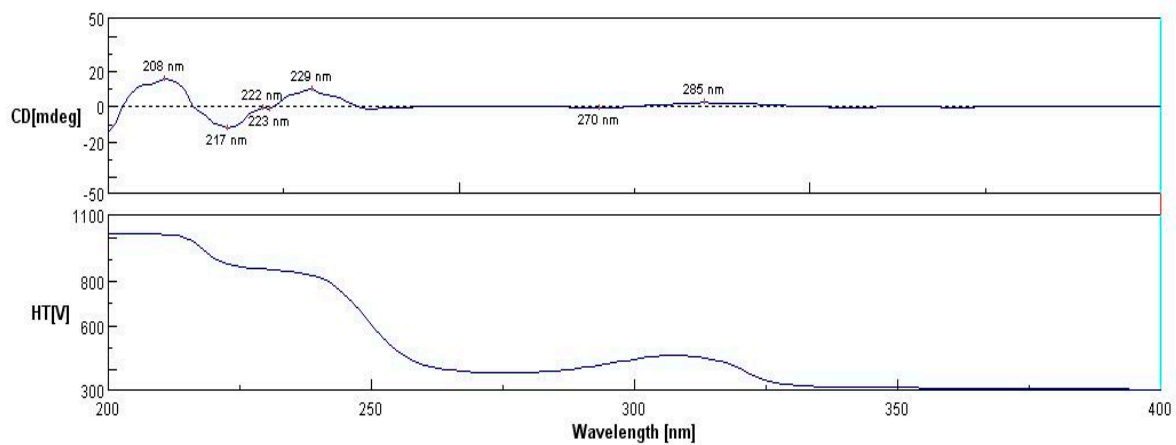

Figure S6. CD spectrum of compound 1.

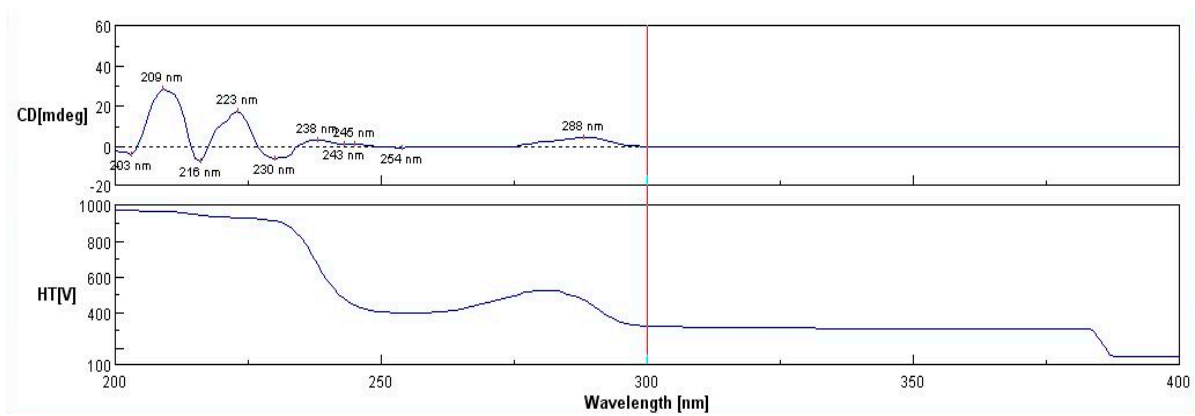

Figure S7. CD spectrum of compound 1a.

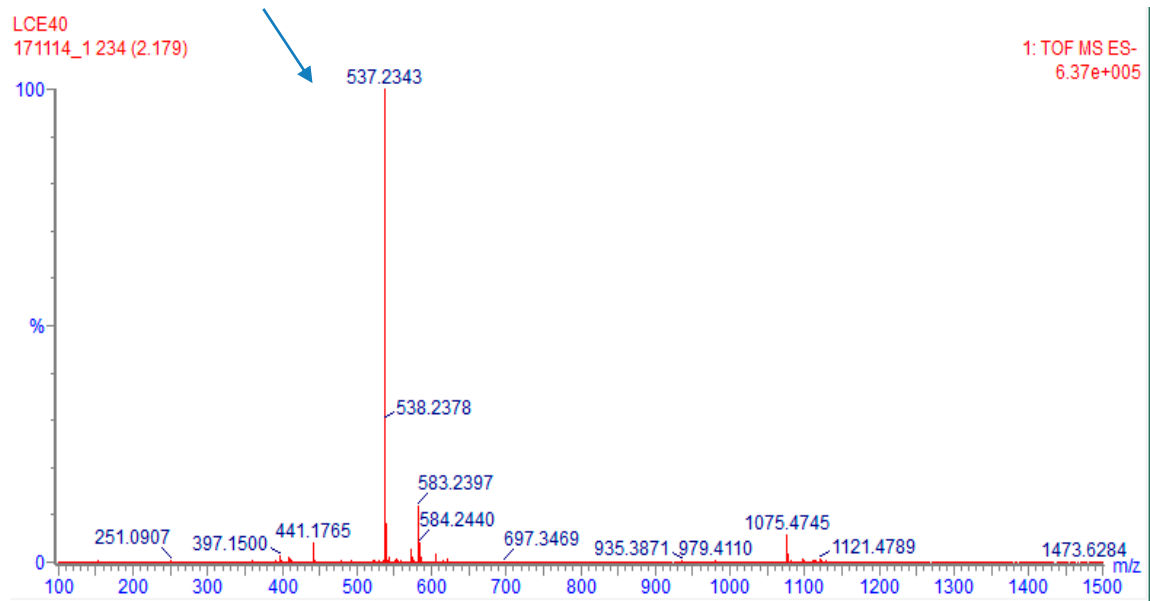

Figure S8. HR-ESI-MS of compound 2.

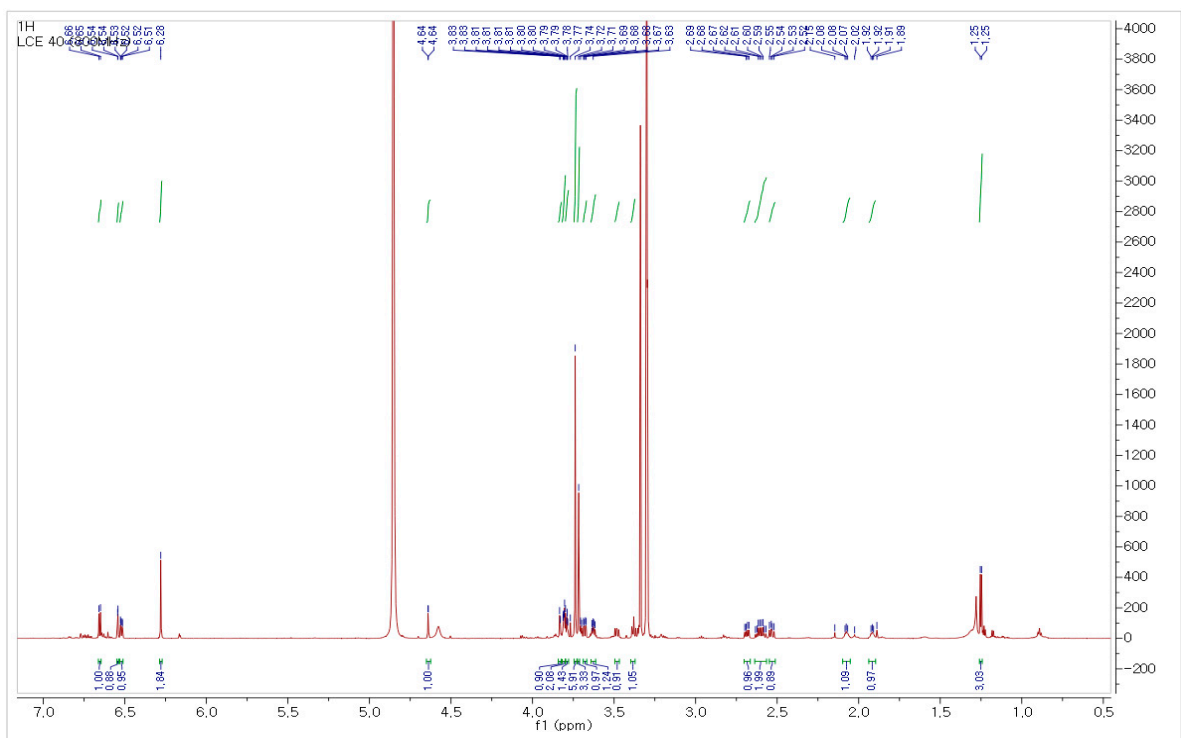

Figure S9. <sup>1</sup>H NMR spectrum of compound 2.

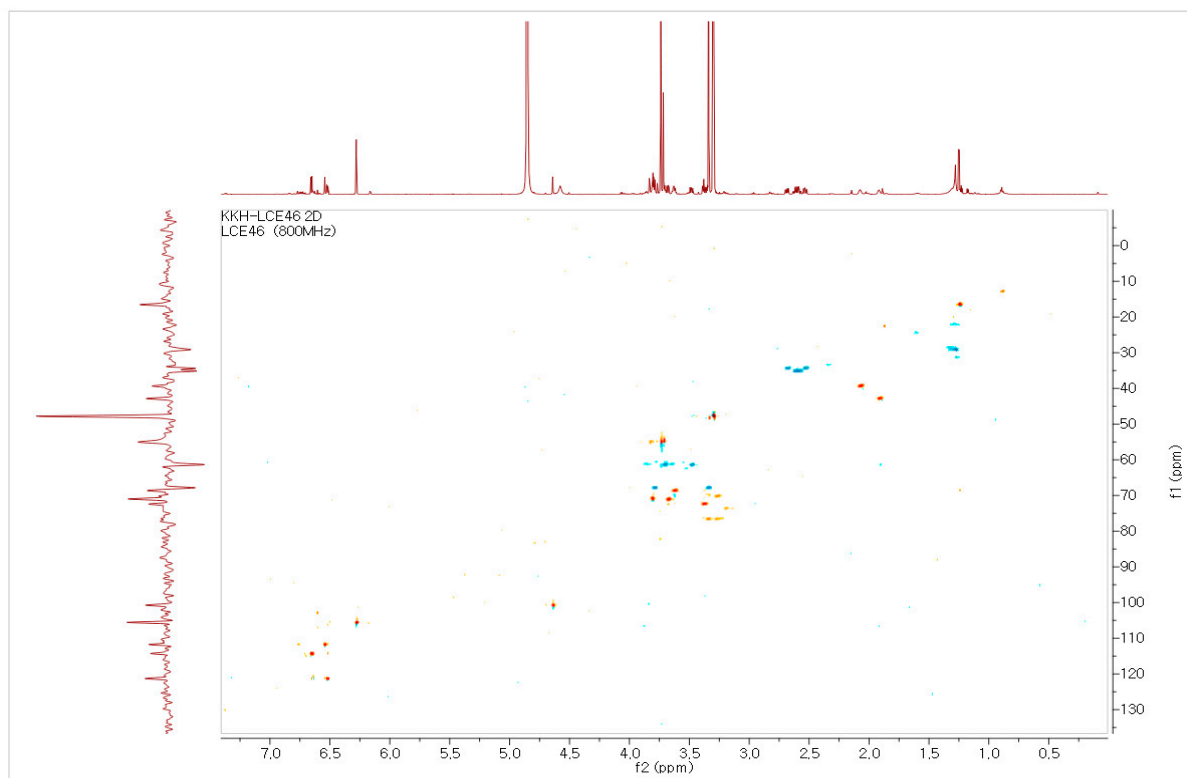

Figure S10. HSQC spectrum of compound 2.

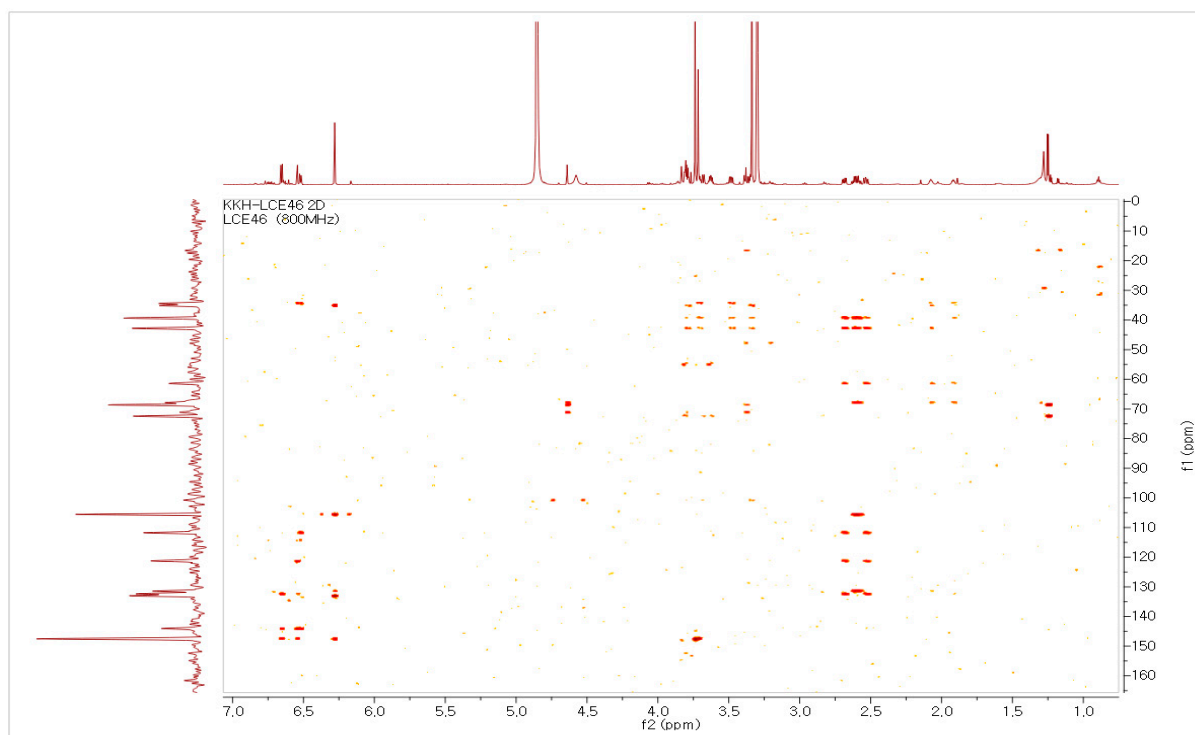

Figure S11. HMBC spectrum of compound 2.



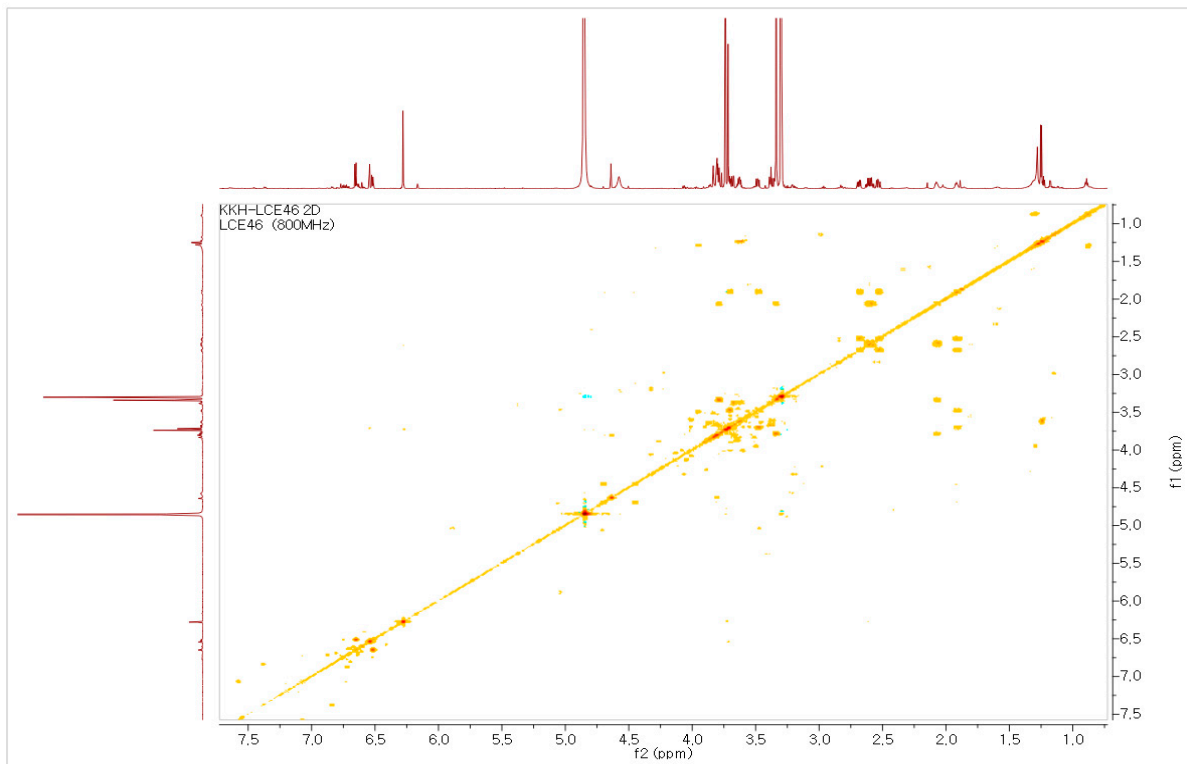

Figure S12.  $^1\text{H}$ - $^1\text{H}$  COSY spectrum of compound 2.

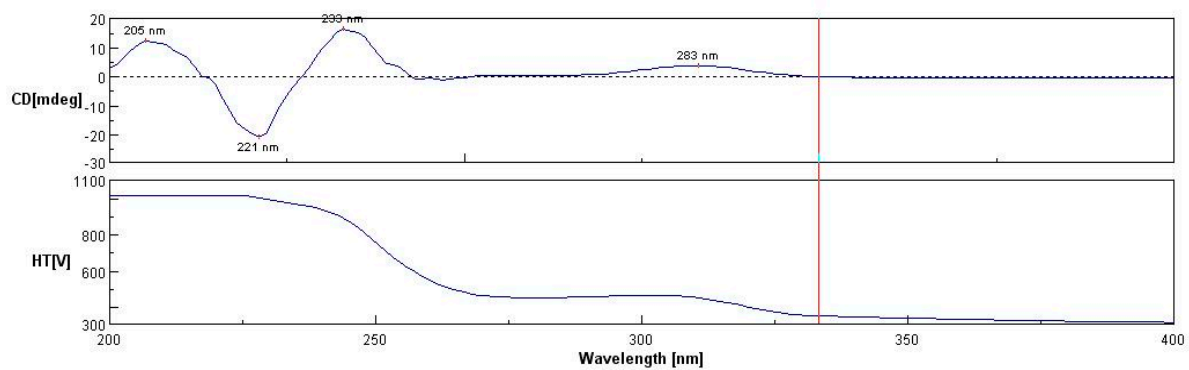

Figure S13. CD spectrum of compound 2.

## LC/MS Analysis of 1 and 2

Stock solutions of the compounds **1** and **2** were prepared by dissolving 0.1 mg of sample in 0.1 mL methanol. Each solution was further diluted with methanol to provide a solution of 100  $\mu\text{g/mL}$ . The solutions were filtered through a 0.45  $\mu\text{m}$  hydrophobic PTFE filter and analyzed by LC/MS (Agilent Technologies, Santa Clara, CA, USA) using a LC-MS Agilent 1200 Series analytical system equipped with a photodiode array (PDA) detector combined with a 6130 Series ESI mass spectrometer. Analysis was performed by injection of 10  $\mu\text{L}$  of each sample using a Kinetex C18 column (2.1  $\times$  100 mm, 5  $\mu\text{m}$ ; Phenomenex, Torrance, CA, USA) set at 25°C. The mobile phase consisting of formic acid in H<sub>2</sub>O [0.1% (v/v)] (A) and methanol (B) was delivered at a flow rate of 0.3 mL/min by applying the following programmed gradient elution: 10%-100% (B) for 30 min, 100% (B) for 1 min, 100% (B) isocratic for 10 min, and then 10% (B) isocratic for 10 min, to perform post-run reconditioning of the column.

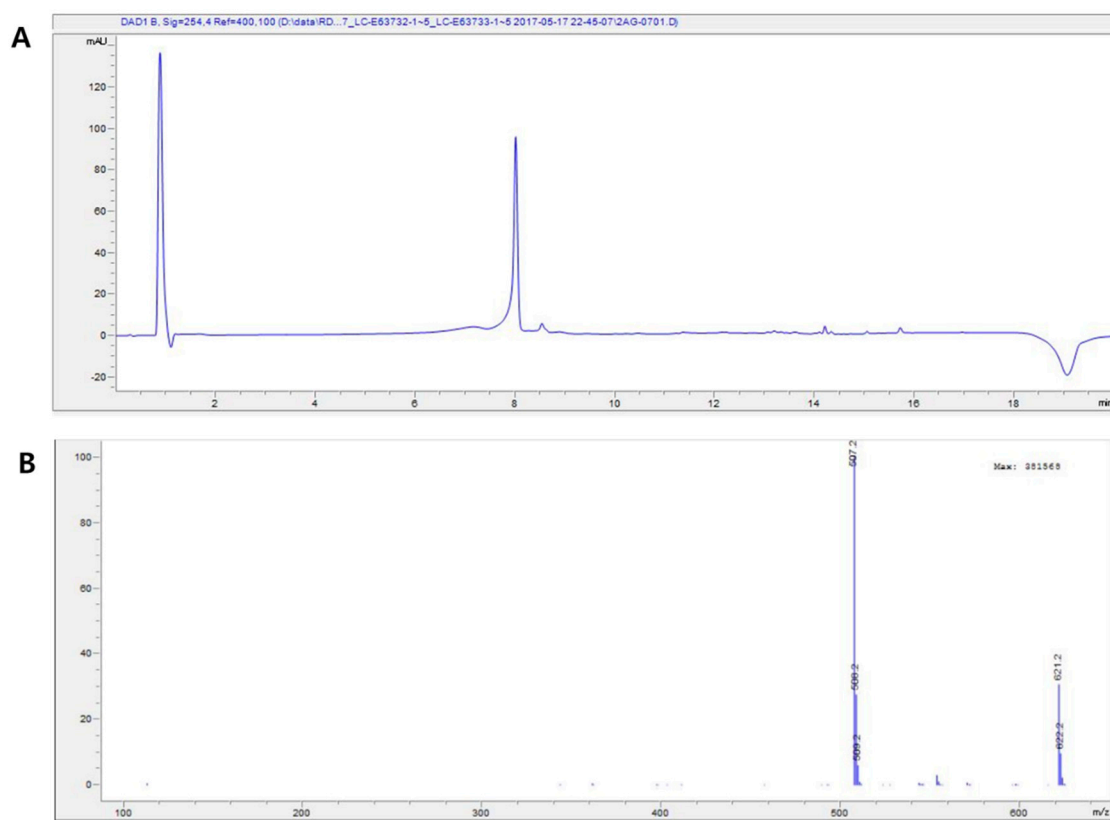

**Figure S14.** The LC/MS analysis of compound **1**. (A) UV chromatogram of LC/MS (detection wavelength was set as 254 nm) of compound **1**. (B) Negative ion-mode ESI-MS data of compound **1** in LC/MS analysis.

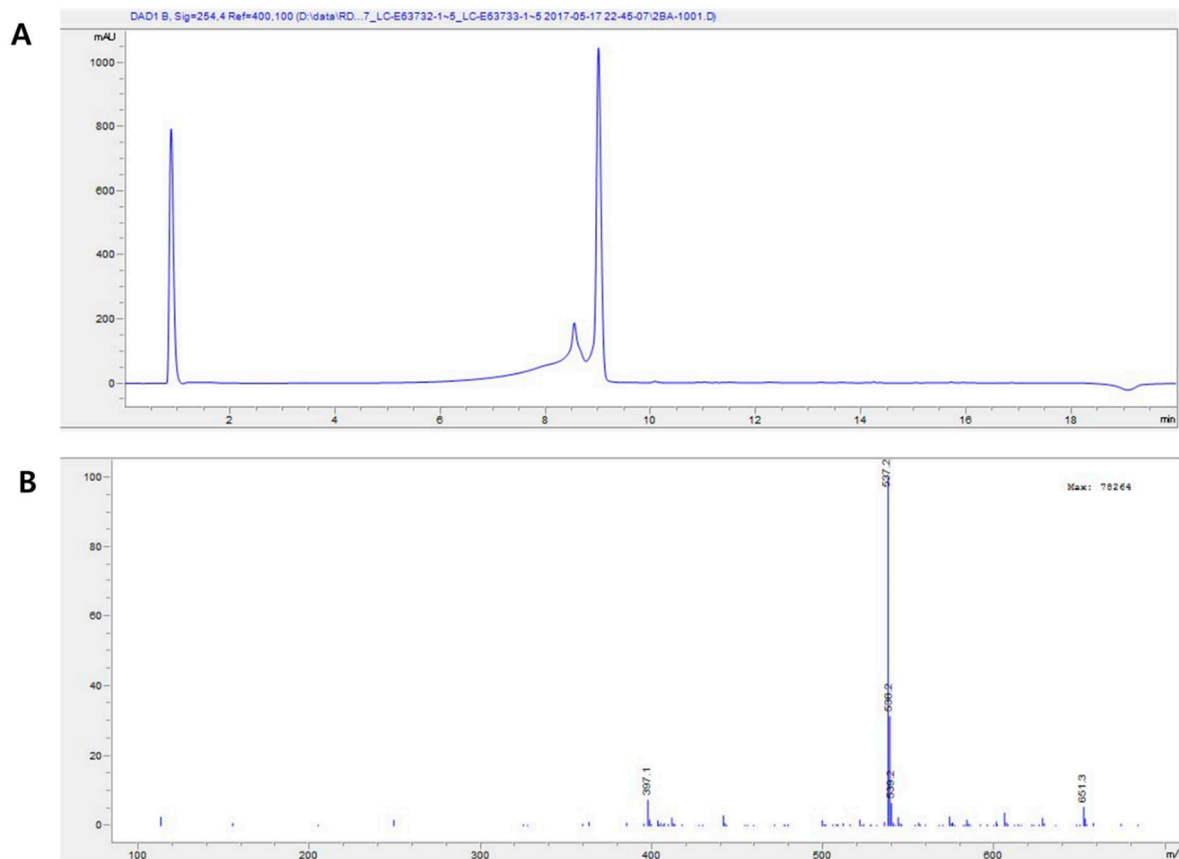

**Figure S15.** The LC/MS analysis of compound **2**. **(A)** UV chromatogram of LC/MS (detection wavelength was set as 254 nm) of compound **2**. **(B)** Negative ion-mode ESI-MS data of compound **2** in LC/MS analysis.

**Table S1** Cytotoxicity of compounds **1–14** against four cultured human breast cancer cells using the SRB bioassay in vitro.

| Compound               | IC <sub>50</sub> (μM) <sup>a</sup> |        |            |        |
|------------------------|------------------------------------|--------|------------|--------|
|                        | Bt549                              | MCF7   | MDA-MB-231 | HCC70  |
| <b>1</b>               | 26.16                              | > 30.0 | 24.38      | 25.04  |
| <b>2</b>               | > 30.0                             | > 30.0 | > 30.0     | > 30.0 |
| <b>3</b>               | > 30.0                             | > 30.0 | > 30.0     | > 30.0 |
| <b>4</b>               | > 30.0                             | 28.08  | > 30.0     | > 30.0 |
| <b>5</b>               | > 30.0                             | > 30.0 | > 30.0     | 24.81  |
| <b>6</b>               | > 30.0                             | 29.18  | 27.57      | 28.94  |
| <b>7</b>               | > 30.0                             | > 30.0 | > 30.0     | > 30.0 |
| <b>8</b>               | > 30.0                             | > 30.0 | > 30.0     | > 30.0 |
| <b>9</b>               | > 30.0                             | > 30.0 | > 30.0     | > 30.0 |
| <b>10</b>              | > 30.0                             | > 30.0 | > 30.0     | > 30.0 |
| <b>11</b>              | > 30.0                             | > 30.0 | > 30.0     | > 30.0 |
| <b>12</b>              | > 30.0                             | > 30.0 | > 30.0     | > 30.0 |
| <b>13</b>              | > 30.0                             | > 30.0 | > 30.0     | > 30.0 |
| <b>14</b>              | > 30.0                             | > 30.0 | > 30.0     | > 30.0 |
| Etoposide <sup>b</sup> | 1.93                               | 1.12   | 1.36       | 1.79   |

<sup>a</sup> IC<sub>50</sub> value of compounds against each tumor cell line, which was defined as the concentration (μM) that caused 50% inhibition of cell growth in vitro. <sup>b</sup> Etoposide served as a positive control.
